# Supplementary material for: Immunostimulatory Activity of the Cytokine-Based Biologic, IRX-2, on Human Papillomavirus-Exposed Langerhans Cells
Source: PubMed Central journal article supplement (PMC4854212; doi:10.1089/jir.2015.0115), 2016-05-01
Supplement: Supp_Fig2.pdf [file Supp_Fig2.pdf]

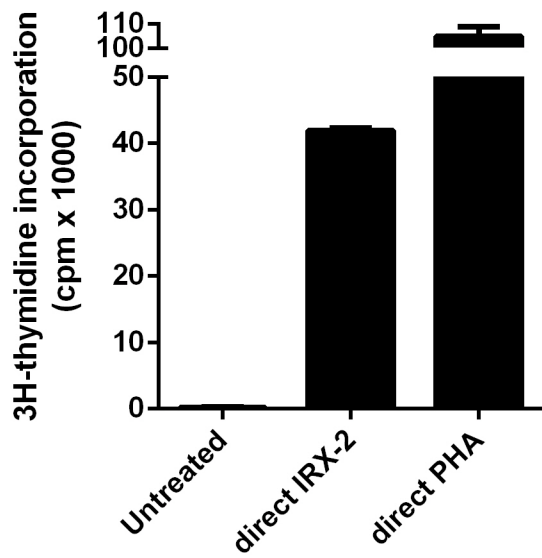

**Supplemental Figure 2.** T cells were left untreated or were treated with IRX-2 or PHA (positive control) for 72 h at 37°C. After 48 h, cells were pulsed with 3H-thymidine for 18 h. On day 3, cells were harvested onto filter plates and incorporated thymidine measured on a radioactive scintillation counter. Data represent the mean counts per minute (cpm)  $\pm$  SD.
